# Supplementary material
Source: PubMed Central journal article supplement (PMC5987283)
Supplement: supplementary_material.pdf [file supplementary_material.pdf]

**Supplementary Figure 1. Flow chart of the two phases in the study.**

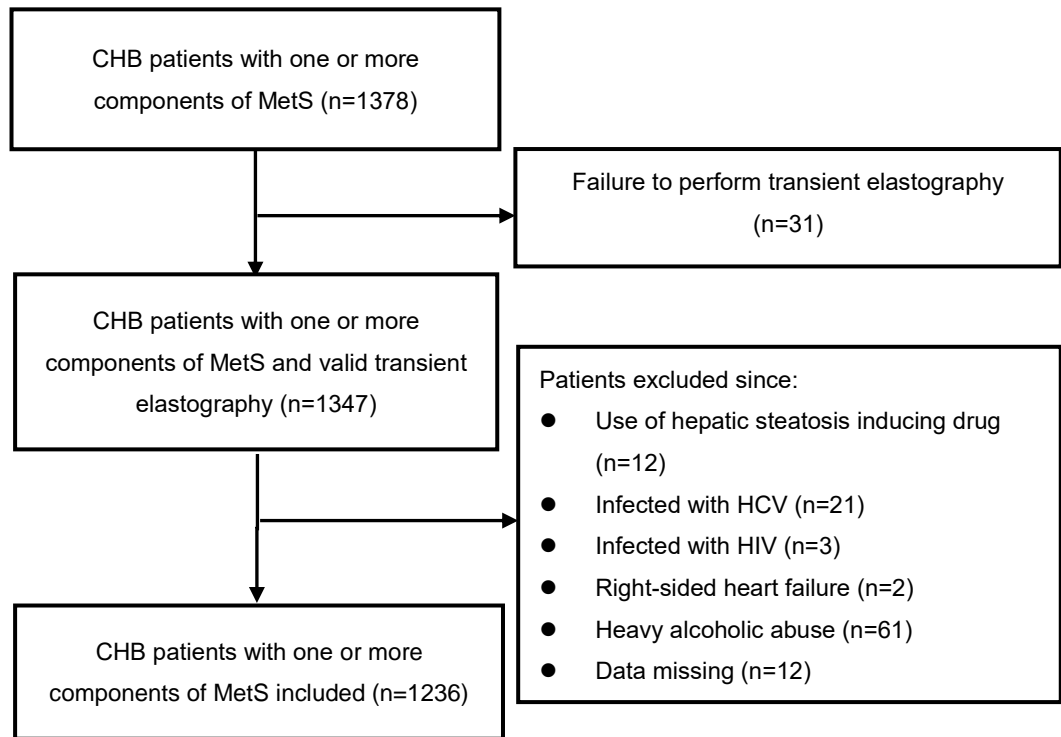

**Supplementary Fig. 2** CAP value was also significantly higher in patients with alcohol consumption ( $246.51 \pm 56.47$  vs  $233.06 \pm 56.61$  dB/m,  $P < 0.001$ ); in patients with hyperuricemia ( $243.49 \pm 57.62$  vs  $234.33 \pm 56.52$  dB/m,  $P = 0.024$ ); in patients with hypertension ( $245.29 \pm 57.91$  vs  $224.83 \pm 53.40$  dB/m,  $P < 0.001$ ) and in patients with hyperlipidemia ( $245.27 \pm 57.30$  vs  $234.06 \pm 56.55$  dB/m,  $P = 0.007$ ).

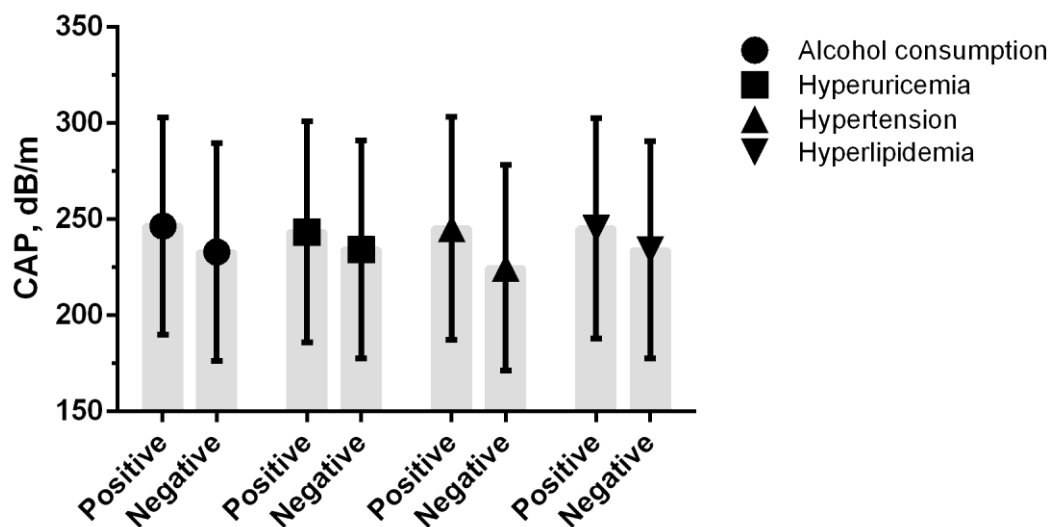

**Supplementary Fig. 3** CAP could effectively distinguish between the different grades of hypertension. The average CAP was  $224.83 \pm 53.40$  dB/m in normotensive patients, and  $244.16 \pm 57.66$  dB/m,  $259.01 \pm 60.8$  dB/m and  $264.00 \pm 57.3$  dB/m in patients with hypertension Grades 1, 2, and 3, respectively ( $P < 0.001$ ).

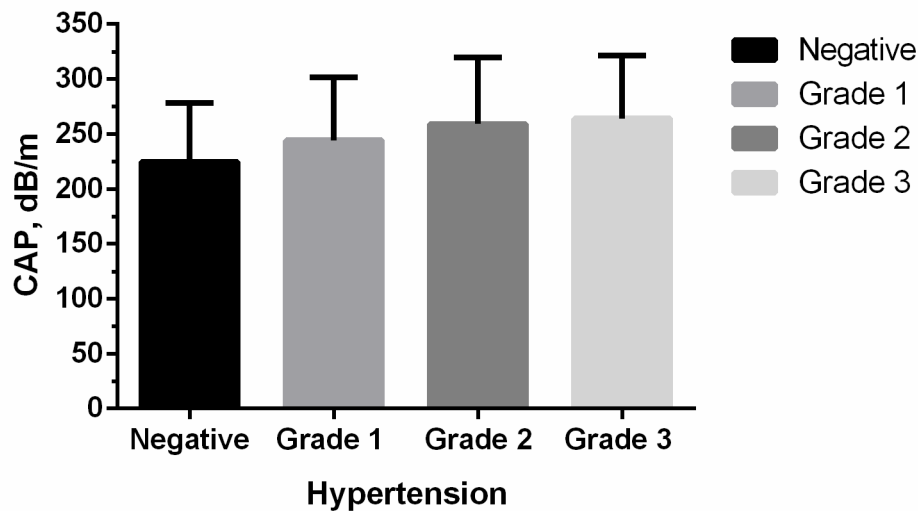

### Supplementary Table 1

Demographics and clinical characteristics of study subjects

|                                 |                    |
|---------------------------------|--------------------|
| <b>Sample size, n</b>           | 1236               |
| <b>Demographic data</b>         |                    |
| Sex (male), n(%)                | 890 (72.0%)        |
| Age (years)                     | $42.71 \pm 12.18$  |
| Smoking, n(%)                   | 329 (26.6%)        |
| Alcohol consumption, n(%)       | 285 (23.1%)        |
| T2DM, n(%)                      | 166 (13.4%)        |
| Metabolic syndrome, n(%)        | 145 (11.7%)        |
| <b>Anthropometric variables</b> |                    |
| Weight, kg                      | $65.51 \pm 13.22$  |
| Height, cm                      | $165.73 \pm 8.43$  |
| SBP, mmHg                       | $127.55 \pm 13.41$ |
| DBP, mmHg                       | $81.78 \pm 9.41$   |
| Waist circumference, cm         | $81.53 \pm 10.88$  |
| Hip circumference, cm           | $91.89 \pm 7.25$   |
| CAP, dB/m                       | $236.16 \pm 56.84$ |
| Liver stiffness, Kpa            | $8.65 \pm 9.16$    |
| <b>Laboratory data</b>          |                    |
| PLT, $10^9/L$                   | $243.08 \pm 59.34$ |
| ALT, U/L                        | $90.73 \pm 50.35$  |
| AST, U/L                        | $59.95 \pm 34.19$  |
| GGT, U/L                        | $63.45 \pm 34.46$  |

|                                 |               |
|---------------------------------|---------------|
| Total cholesterol, mmol/L       | 5.09 ± 0.75   |
| HDL-cholesterol, mmol/L         | 1.32 ± 0.31   |
| LDL-cholesterol, mmol/L         | 3.01 ± 0.69   |
| Triglycerides, mmol/L           | 1.41 ± 0.51   |
| Uric acid, mmol/L               | 418.93±101.15 |
| HBV DNA, log <sub>10</sub> IU/m | 0.98 ± 1.71   |
| HBeAg positive, n(%)            | 720 (58.3)    |

---

**Abbreviations:** T2DM: type 2 diabetes mellitus; SBP: systolic blood pressure; DBP: diastolic blood pressure; CAP: controlled attenuation parameter; PLT: platelets; ALT: serum aspartate aminotransferase; AST: alanine aminotransferase; GGT: gamma-glutamyltransferase; HBeAg: hepatitis B e antigen
